# Supplementary material for: Phenol Degradation by Pseudarthrobacter phenanthrenivorans Sphe3
Source: MDPI journal article supplement (doi:10.3390/microorganisms11020524), 2023-02-18
Supplement: s1 [file s1]

### Supplementary Materials

Table S1. Oligonucleotides used for the RT-qPCR experiments.

| Gene Locus Tag/<br>Gene Name   | Oligonucleotides<br>Designation | Oligonucleotides Sequence<br>(5'→3') | Size<br>(bp) |
|--------------------------------|---------------------------------|--------------------------------------|--------------|
| Asphe3_36590/ <i>phehydrox</i> | phehydroxfor                    | GTCACCGACTTCCCCGATAT                 | 167          |
|                                | phehydroxrev                    | ATCTGCTCGATGGTGGTGT                  |              |
| Asphe3_35170/ <i>cat12diox</i> | cat12dioxfor                    | AAACGGATACCCGGAAAGAG                 | 198          |
|                                | cat12dioxrev                    | GGGCGTTGTACTCCTCGTAG                 |              |
| Asphe3_40510/ <i>cat23diox</i> | cat23dioxfor                    | AGCCAGTTCCACCACGATAT                 | 182          |
|                                | cat23dioxrev                    | CAATACTGGTTTCCGCCGAC                 |              |
| Asphe3_00060/ <i>gyrβ</i>      | gyrβfor                         | GGCTAACGACAATACAGATA                 | 210          |
|                                | gyrβrev                         | ACCACTTCATAAACAAGGT                  |              |

Table S2. Measurements of remaining phenol in Sphe3 cultures in various phenol concentrations, at selected timepoints.

| Time (Hours) | MEAN (N=3)      | SD (±) |
|--------------|-----------------|--------|
|              | <b>300 mg/L</b> |        |
| 0            | 301,3           | 3,2    |
| 6            | 245,3           | 1,5    |
| 12           | 244,3           | 1,5    |
| 24           | 243,6           | 4,5    |
|              | <b>500 mg/L</b> |        |
| 0            | 500,3           | 2,5    |
| 6            | 348,6           | 1,2    |
| 12           | 345             | 3      |
| 24           | 345,6           | 2,5    |
|              | <b>750 mg/L</b> |        |
| 0            | 748,6           | 2,3    |
| 6            | 448,6           | 4,1    |
| 12           | 448,3           | 1,5    |

|    |                  |      |
|----|------------------|------|
| 24 | 445              | 1    |
|    | <b>1000 mg/L</b> |      |
| 0  | 1002,3           | 2,5  |
| 6  | 671,6            | 1,5  |
| 12 | 610,6            | 10,1 |
| 24 | 499,6667         | 10   |
|    | <b>1200 mg/L</b> |      |
| 0  | 1200             | 3    |
| 6  | 869              | 6,1  |
| 12 | 829,6667         | 2,5  |
| 24 | 819              | 3,6  |
|    | <b>1500 mg/L</b> |      |
| 0  | 1503             | 2,6  |
| 6  | 1043,3           | 7,6  |
| 12 | 1043,3           | 15,3 |
| 24 | 1021,6           | 12,6 |

Table presents means of three measurements (N=3), along with the standard deviations ( $\pm$ SD).

Table S3. BLASTP search of Sphe3 phenol hydroxylase and catechol dioxygenases.

| <b>Sphe3 Gene Under Study</b> | <b>Enzyme Description</b> | <b>Microorganism</b>             | <b>Query Coverage (%)</b> | <b>Per. Identity (%)</b> | <b>Length (aa)</b> | <b>Accession No.</b> |
|-------------------------------|---------------------------|----------------------------------|---------------------------|--------------------------|--------------------|----------------------|
| Asphe3_36590                  | phenol 2-monooxygenase    | <i>Arthrobacter</i> sp. NtRootA9 | 99                        | 87.12                    | 635                | BCW20813.1           |
|                               |                           | <i>Arthrobacter</i> sp. OY3WO11  | 100                       | 87.42                    | 636                | OAE03256.1           |
|                               |                           | <i>Arthrobacter</i> sp. PvP023   | 98                        | 86.51                    | 638                | MBP1134756.1         |
|                               |                           | <i>Arthrobacter</i> sp. Leaf137  | 99                        | 85.90                    | 632                | KQQ83477.1           |
|                               |                           | <i>Arthrobacter</i> sp. OV608    | 100                       | 86.79                    | 636                | SER24611.1           |

|                  |                              |                                                               |     |       |     |                    |
|------------------|------------------------------|---------------------------------------------------------------|-----|-------|-----|--------------------|
|                  |                              | <i>Arthrobacter</i><br>sp. OV608                              | 100 | 84.80 | 638 | SER22274.1         |
|                  |                              | <i>Arthrobacter</i><br>sp. StoSoilB22                         | 99  | 84.29 | 644 | BCW63098.1         |
| Asphe3_351<br>70 | Catechol 1,2-<br>dioxygenase | <i>Arthrobacter</i><br>sp. BB-1                               | 100 | 92.62 | 298 | TNB68529.1         |
|                  |                              | <i>Arthrobacter</i><br>sp. SPG23                              | 100 | 92.28 | 298 | WP_04348102<br>5.1 |
|                  |                              | <i>Arthrobacter</i><br>sp.<br>PAMC25564                       | 100 | 91.61 | 298 | WP_13632106<br>8.1 |
|                  |                              | <i>Pseudarthrobac</i><br><i>ter</i> sp. GA104                 | 100 | 91.95 | 298 | MUU73784.1         |
| Asphe3_405<br>10 | Catechol 2,3-<br>dioxygenase | <i>Rhodococcus</i><br><i>wratislaviensis</i><br>IFP 2016      | 100 | 56.46 | 293 | ELB89778.1         |
|                  |                              | <i>Geobacillus</i><br><i>genomosp.</i> 3                      | 100 | 46.26 | 296 | BAD08308.1         |
|                  |                              | <i>Hydrogenibacil</i><br><i>lus schlegelii</i>                | 100 | 45.64 | 298 | PTQ51344.1         |
|                  |                              | <i>Pseudaminobac</i><br><i>ter</i><br><i>salicylatoxidans</i> | 100 | 38.61 | 301 | PWJ76351.1         |

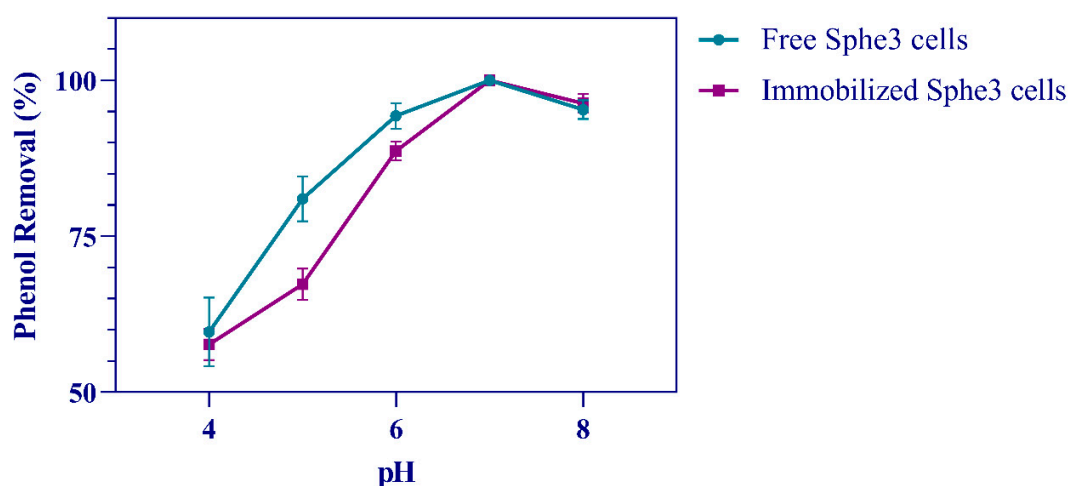

Figure S1. Effect of pH on the phenol removal activity of Sphe3 in its free form (circle) and after immobilization (square). The activities at the optimal pH were set to 100% for each case.

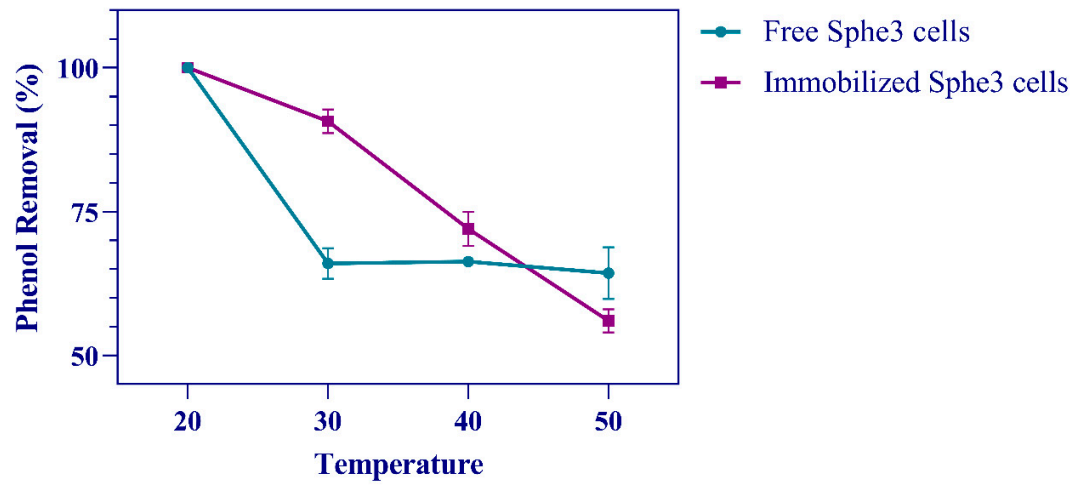

Figure S2. Effect of temperature on the phenol removal activity of Sphe3 in its free form (circle) and after immobilization (square). The activities at the optimal temperature were set to 100% for each case.
